# Supplementary material
Source: PubMed Central journal article supplement (PMC5811223)
Supplement: NIHMS940253-supplement-Supplemental_Files.pdf [file NIHMS940253-supplement-Supplemental_Files.pdf]

## SUPPLEMENTAL INFORMATION

### **Neuromedin S-Producing Neurons Act as Essential Pacemakers in the Suprachiasmatic Nucleus to Couple Clock Neurons and Dictate Circadian Rhythms**

Ivan T. Lee,<sup>1,2,5</sup> Alexander S. Chang,<sup>1,5</sup> Manabu Manandhar,<sup>1,5</sup> Yongli Shan,<sup>2</sup> Junmei Fan,<sup>2</sup> Mariko Izumo,<sup>2</sup> Yuichi Ikeda,<sup>1,3</sup> Toshiyuki Motoike,<sup>1,2,3</sup> Shelley Dixon,<sup>1,2,3</sup> Jeffrey E. Seinfeld,<sup>2</sup> Joseph S. Takahashi,<sup>2,3,4,\*</sup> Masashi Yanagisawa<sup>1,3,4,\*</sup>

<sup>1</sup>Department of Molecular Genetics

<sup>2</sup>Department of Neuroscience

<sup>3</sup>Howard Hughes Medical Institute

University of Texas Southwestern Medical Center, 5323 Harry Hines Blvd., Dallas, TX 75390, USA

<sup>4</sup>International Institute for Integrative Sleep Medicine (WPI-IIIS), University of Tsukuba, Tsukuba 305-8575, Japan

<sup>5</sup>These authors contributed equally to this work

\*Equal corresponding authors: [joseph.takahashi@utsouthwestern.edu](mailto:joseph.takahashi@utsouthwestern.edu),

[masashi.yanagisawa@utsouthwestern.edu](mailto:masashi.yanagisawa@utsouthwestern.edu)

## Supplemental Figure Legends

### Figure S1, related to Figure 1. *Nms* Expression in C57BL/6J Mouse Brain

(A) Representative brain slices from C57BL/6J mice hybridized to anti-sense <sup>35</sup>S-labeled *Nms* riboprobe. The SCN is encircled in red. Only the forebrain was examined.

(B) Higher (dark field) magnification of SCN sections.

### Figure S2, related to Figure 1. Schematic of Mating Crosses

(A) Several generations of crosses were used to produce the *tetO* transgene-containing mice presented in this paper. Mice shaded in light gray represent mice that were used for subsequent crosses. The mouse shaded in dark gray represents the key experimental mouse genotype.

(B) Crosses used to produce the experimental mouse genotypes that contain both the *tetO* transgene and the PER2::LUC transgene. The connotation of the shading is similar to (A).

### Figure S3, related to Figure 1. HA (*Nms*) Expression in the *Nms-Clock*<sup>A19</sup> Mouse Brain

Representative brain slices from *Nms-Clock*<sup>A19</sup> mice are stained with anti-HA. Panels are organized relatively from anterior to posterior. Outside of the SCN, staining can be observed in the Edinger-Westphal nucleus, dorsomedial hypothalamic nucleus, anterior hypothalamic area, ventromedial thalamic nucleus, lateroanterior hypothalamic nucleus, posterior hypothalamic nucleus, median preoptic nucleus, retromammillary nucleus, retrochiasmatic area, external cortex of the inferior colliculus, and pyramidal tract. Not all staining are visibly displayed here.

Abbreviations (for Figure S3 and S7) using nomenclature from Franklin and Paxinos (2008):

DEn, dorsal endopiriform claustrum; IEn, intermediate endopiriform claustrum; AOL, anterior olfactory area, lateral part; AOM, anterior olfactory area, medial part; AOP, anterior olfactory area posterior part; DTT, dorsal tenia tecta; VO, ventral orbital cortex; LO, lateral orbital cortex;

aci, anterior commissure, intrabulbar part; CPu, caudate putamen (striatum); aca, anterior commissure, anterior part; AcbC, accumbens nucleus, core; LSI, lateral septal nucleus, intermediate part; MS, medial septal nucleus; MnPO, median preoptic nucleus; LPO, lateral preoptic area; +MPOM, medial preoptic nucleus, medial part; MPOL, medial preoptic nucleus, lateral part; MPA, medial preoptic area; AVPe, anteroventral periventricular nucleus; VLPO, ventrolateral preoptic nucleus; PVA, paraventricular thalamic nucleus, anterior part; AM, anteromedial thalamic nucleus; CM, central medial thalamic nucleus; Re, reuniens thalamic nucleus; Rh, rhomboid thalamic nucleus; VL, ventrolateral thalamic nucleus; VM, ventromedial thalamic nucleus; PLH, peduncular part of lateral hypothalamus; AHA, anterior hypothalamic area, anterior part; LA, lateroanterior hypothalamic nucleus; SCN, suprachiasmatic nucleus; VA, Ventral anterior thalamic nucleus; BMA, basomedial amygdaloid nucleus, anterior part; ACo, anterior cortical amygdaloid area; MeAD, medial amygdaloid nucleus, anterodorsal part; MeAV, medial amygdaloid nucleus, anteroventral part; AHP, anterior hypothalamic area, posterior part; AHC, anterior hypothalamic area, central part; TuLH, tuberal region of lateral hypothalamus; VMH, ventromedial hypothalamic nucleus; RSD, retrosplenial dysgranular cortex; RSGc, retrosplenial granular cortex c region; MPtA, medial parietal association cortex; DM, dorsomedial hypothalamic nucleus; VMHDM, ventromedial hypothalamic nucleus, dorsomedial part; VMHVL, ventromedial hypothalamic nucleus, ventrolateral part; Arc, arcuate hypothalamic nucleus; MePD, medial amygdaloid nucleus, posterodorsal part; MePV, medial amygdaloid nucleus, posteroventral part; cp, cerebral peduncle; VPL, ventral posterolateral thalamic nucleus; VPM, ventral posteromedial thalamic nucleus; ZID, zona incerta, dorsal part; ZIV, zona incerta, ventral part; CA1, field CA1 of the hippocampus; CA3, field CA3 of the hippocampus; DG, dentate gyrus; DLG, dorsal lateral geniculate nucleus; PGPC, pregeniculate nucleus,

parvicellular part; PGMc, pregeniculate nucleus, magnocellular part; Po, posterior thalamic nuclear group; PH, posterior hypothalamic nucleus; PAG, periaqueductal gray; APTD, anterior pretectal nucleus, dorsal part; PCom, nucleus of the posterior commissure; MCPC, magnocellular nucleus of the posterior commissure; InWh, intermediate white layer of the superior colliculus; InG, intermediate gray layer of the superior colliculus, Op, optic nerve layer of the superior colliculus; Dk, nucleus of Darkschewitsch; EW, Edinger-Westphal nucleus; MGD, medial geniculate nucleus, dorsal part; MGv, medial geniculate nucleus, ventral part; SNR, substantia nigra, reticular part; VTA, ventral tegmental area; MM, medial mammillary nucleus, medial part; ML, medial mammillary nucleus, lateral part; RM, retromammillary nucleus; AHIPM, amygdalohippocampal area, posteromedial part; PMCo, posteromedial cortical amygdaloid area; BLP, basolateral amygdaloid nucleus, posterior part; SuVe, superior vestibular nucleus; LC, locus coeruleus; LDTg, laterodorsal tegmental nucleus; DTgP, dorsal tegmental nucleus, pericentral part; IRt, intermediate reticular nucleus; DMTg, dorsomedial tegmental area; MVeMC, medial vestibular nucleus, magnocellular part; MVePC, medial vestibular nucleus, parvicellular part; Pr, prepositus nucleus; Gi, gigantocellular reticular nucleus; RMg, raphe magnus nucleus; py, pyramidal tract; ml, medial lemniscus; VeCb, vestibulocerebellar nucleus; 4/5Cb, lobules 4 and 5 of the cerebellar vermis; icp, inferior cerebellar peduncle.

**Figure S4, related to Figure 1. Distribution of VIP and GRP-Expressing Neurons in the Mouse SCN**

(A) Double staining of GRP (green) and VIP (red) on SCN sections of colchicine-treated C57BL/6J mice. TO-PRO-3 counterstains the nuclei. The scale bar is 50  $\mu$ m. Quantitative data are shown to the right.

**Figure S5, related to Figure 2. *Clock*<sup>A19</sup> Expression within VIP-Producing Neurons in the SCN Does Not Lengthen Behavioral Circadian Period**

(A and B) Double staining of HA (green) and VIP (red) on SCN sections of *Vip-Clock*<sup>A19</sup> mice. TO-PRO-3 counterstains the nuclei. Scale bars are 50  $\mu$ m in (A) and 5  $\mu$ m in (B). Quantitative data are shown at the bottom in (B).

(C) Double staining of HA (green) and AVP (red) on SCN sections of *Vip-Clock*<sup>A19</sup> mice. Scale bars are 50  $\mu$ m. HA-positive cells do not co-localize with AVP-immunoreactive neurons.

(D) Representative actograms of *Vip-Clock*<sup>A19</sup> (bottom panel) and *R26-Vip* (top panel) mice.

Colored bars represent the days of analyses presented in (E).

(E) Quantification of circadian activity in *Vip-Clock*<sup>A19</sup> transgenic and *R26-Vip* control mice.

Mean free-running period, amplitude, and average activity counts were not significantly different between the genotypes (Student's t-test,  $p > 0.05$ ; *R26-Vip*,  $n=9$ ; *Vip-Clock*<sup>A19</sup>,  $n=9$ ). Values are presented as mean  $\pm$  SEM.

**Figure S6, related to Figure 3. NMS and YFP co-localization in *Nms-iCre;YFP* SCN, and loss of synchrony in *Nms-Bmal1*<sup>fl/fl</sup> mice.**

(A) Double staining of YFP (green) and NMS (red) on SCN sections of *Nms-iCre;YFP* mice using anti-GFP and anti-NMS antibodies, respectively. The scale bars are 50  $\mu$ m (top panels) and 5  $\mu$ m (bottom panels). Quantitative data are shown to the right.

(B) Representative raster and Rayleigh plots of PER2::LUC oscillation in 50 individual neurons from the SCN of adult *Bmal1*<sup>fl/fl</sup> and *Nms-Bmal1*<sup>fl/fl</sup> mice. In the raster plot, the red corresponds to peak bioluminescence and the green to trough. The length of the arrow in the Rayleigh plot represents the strength of synchronization.

**Figure S7, related to Figure 6. Distribution of GFP (*Nms*)-Expressing Neurons in the Mouse Brain**

Representative brain slices from *Nms-TeNT* mice were stained with anti-GFP. Panels are organized relatively from anterior to posterior. Outside of the SCN, staining can be observed in the Edinger-Westphal nucleus, dorsomedial hypothalamic nucleus, lateroanterior hypothalamic nucleus, posterior hypothalamic nucleus, median preoptic nucleus, medial preoptic nucleus, and retromammillary nucleus. Not all regions with staining are displayed here. Names of the abbreviations are listed in Figure S2.

**Table S1, related to Figures 1-7. List of Mouse Lines.**

| <b>Abbreviations</b>                 | <b>Full Description of Genotypes</b>                                                           | <b>Phenotype</b>                                   |
|--------------------------------------|------------------------------------------------------------------------------------------------|----------------------------------------------------|
| <i>R26</i>                           | <i>ROSA-STOP-tTA<sup>KI/KI</sup></i>                                                           | Normal rhythms                                     |
| <i>R26-Nms</i>                       | <i>Nms-iCre; ROSA-STOP-tTA<sup>KI/KI</sup></i>                                                 | Normal rhythms                                     |
| <i>R26-Clock<sup>A19</sup></i>       | <i>ROSA-STOP-tTA<sup>KI/KI</sup>; tetO-Clock<sup>A19</sup></i>                                 | Normal rhythms                                     |
| <i>Nms-Clock<sup>A19</sup></i>       | <i>Nms-iCre; ROSA-STOP-tTA<sup>KI/KI</sup>; tetO-Clock<sup>A19</sup></i>                       | Dox-reversible lengthening of period               |
| <i>R26-Nms;Luc</i>                   | <i>Nms-iCre; ROSA-STOP-tTA<sup>KI/KI</sup>; PER2<sup>LUC/+</sup></i>                           | Normal rhythms                                     |
| <i>R26-Clock<sup>A19</sup>;Luc</i>   | <i>ROSA-STOP-tTA<sup>KI/KI</sup>; tetO-Clock<sup>A19</sup>; PER2<sup>LUC/+</sup></i>           | Normal rhythms                                     |
| <i>Nms-Clock<sup>A19</sup>;Luc</i>   | <i>Nms-iCre; ROSA-STOP-tTA<sup>KI/KI</sup>; tetO-Clock<sup>A19</sup>; PER2<sup>LUC/+</sup></i> | Lengthened period                                  |
| <i>R26-Vip</i>                       | <i>Vip-Cre<sup>KI/KI</sup>; ROSA-STOP-tTA<sup>KI/KI</sup></i>                                  | Normal rhythms                                     |
| <i>Vip-Clock<sup>A19</sup></i>       | <i>Vip-Cre<sup>KI/KI</sup>; ROSA-STOP-tTA<sup>KI/KI</sup>; tetO-Clock<sup>A19</sup></i>        | Normal rhythms                                     |
| <i>Nms-iCre;YFP</i>                  | <i>Nms-iCre; ROSA-STOP-YFP<sup>KI/KI</sup></i>                                                 | <i>Nms</i> distribution replicated                 |
| <i>Bmal1<sup>fl/fl</sup></i>         | <i>Bmal1<sup>fl/fl</sup></i>                                                                   | Normal rhythms                                     |
| <i>Nms-Bmal1<sup>fl/+</sup></i>      | <i>Nms-iCre; Bmal1<sup>fl/+</sup></i>                                                          | Normal rhythms                                     |
| <i>Nms-Bmal1<sup>fl/fl</sup></i>     | <i>Nms-iCre; Bmal1<sup>fl/fl</sup></i>                                                         | Loss of rhythms                                    |
| <i>Nms-Bmal1<sup>fl/fl</sup>;YFP</i> | <i>Nms-iCre; Bmal1<sup>fl/fl</sup>; ROSA-STOP-YFP<sup>KI/KI</sup></i>                          | <i>Bmal1</i> deletion in <i>Nms</i> cells assessed |
| <i>Nms-Bmal1<sup>fl/fl</sup>;Luc</i> | <i>Nms-iCre; Bmal1<sup>fl/fl</sup>; PER2<sup>LUC/LUC</sup></i>                                 | Desynchronized                                     |
| <i>R26-Per2</i>                      | <i>ROSA-STOP-tTA<sup>KI/KI</sup>; tetO-Per2</i>                                                | Normal rhythms                                     |
| <i>Nms-Per2</i>                      | <i>Nms-iCre; ROSA-STOP-tTA<sup>KI/KI</sup>; tetO-Per2</i>                                      | Dox-reversible loss of rhythms                     |
| <i>R26-Per2;Luc</i>                  | <i>ROSA-STOP-tTA<sup>KI/KI</sup>; tetO-Per2; PER2<sup>LUC/+</sup></i>                          | Normal rhythms                                     |
| <i>Nms-Per2;Luc</i>                  | <i>Nms-iCre; ROSA-STOP-tTA<sup>KI/KI</sup>; tetO-Per2; PER2<sup>LUC/+</sup></i>                | Damped/desynchronized                              |
| <i>Nms-/-</i>                        | <i>Nms-/-</i>                                                                                  | Normal rhythms                                     |
| <i>Nmu-/-</i>                        | <i>Nmu-/-</i>                                                                                  | Normal rhythms                                     |

|                                                                                    |                                                                                     |                                |
|------------------------------------------------------------------------------------|-------------------------------------------------------------------------------------|--------------------------------|
| <i>Nms<sup>-/-</sup>Nmu<sup>-/-</sup></i>                                          | <i>Nms<sup>-/-</sup>; Nmu<sup>-/-</sup></i>                                         | Normal rhythms                 |
| <i>R26-TeNT</i>                                                                    | <i>ROSA-STOP-tTA<sup>KI/KI</sup>; tetO-TeNT</i>                                     | Normal rhythms                 |
| <i>Nms-TeNT</i>                                                                    | <i>Nms-iCre; ROSA-STOP-tTA<sup>KI/KI</sup>; tetO-TeNT</i>                           | Dox-reversible loss of rhythms |
| <i>R26-Nms;SynGFP</i>                                                              | <i>Nms-iCre; ROSA-STOP-tTA<sup>KI/KI</sup>; tetO-SynGFP</i>                         | VAMP2 cleavage control         |
| <i>Nms-TeNT;SynGFP</i>                                                             | <i>Nms-iCre; ROSA-STOP-tTA<sup>KI/KI</sup>; tetO-TeNT;<br/>tetO-SynGFP</i>          | VAMP2 cleavage confirmed       |
| <i>R26-TeNT;Luc</i>                                                                | <i>ROSA-STOP-tTA<sup>KI/KI</sup>; tetO-TeNT; PER2<sup>LUC/+</sup></i>               | Normal rhythms                 |
| <i>Nms-TeNT;Luc</i>                                                                | <i>Nms-iCre; ROSA-STOP-tTA<sup>KI/KI</sup>; tetO-TeNT;<br/>PER2<sup>LUC/+</sup></i> | Damped/desynchronized          |
| Note: Single tetO transgenic mouse lines previously published are not listed here. |                                                                                     |                                |



**A**

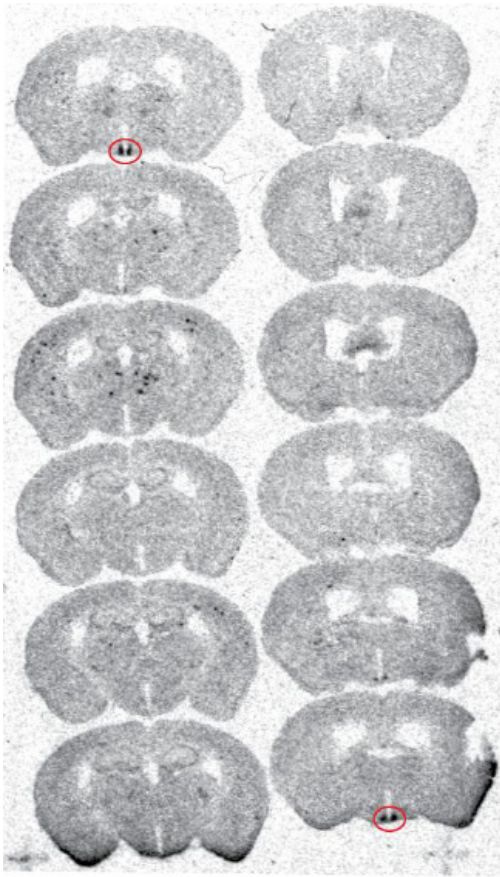

**B**

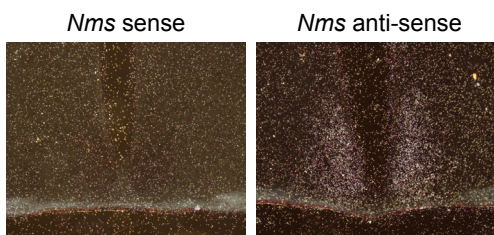

**A**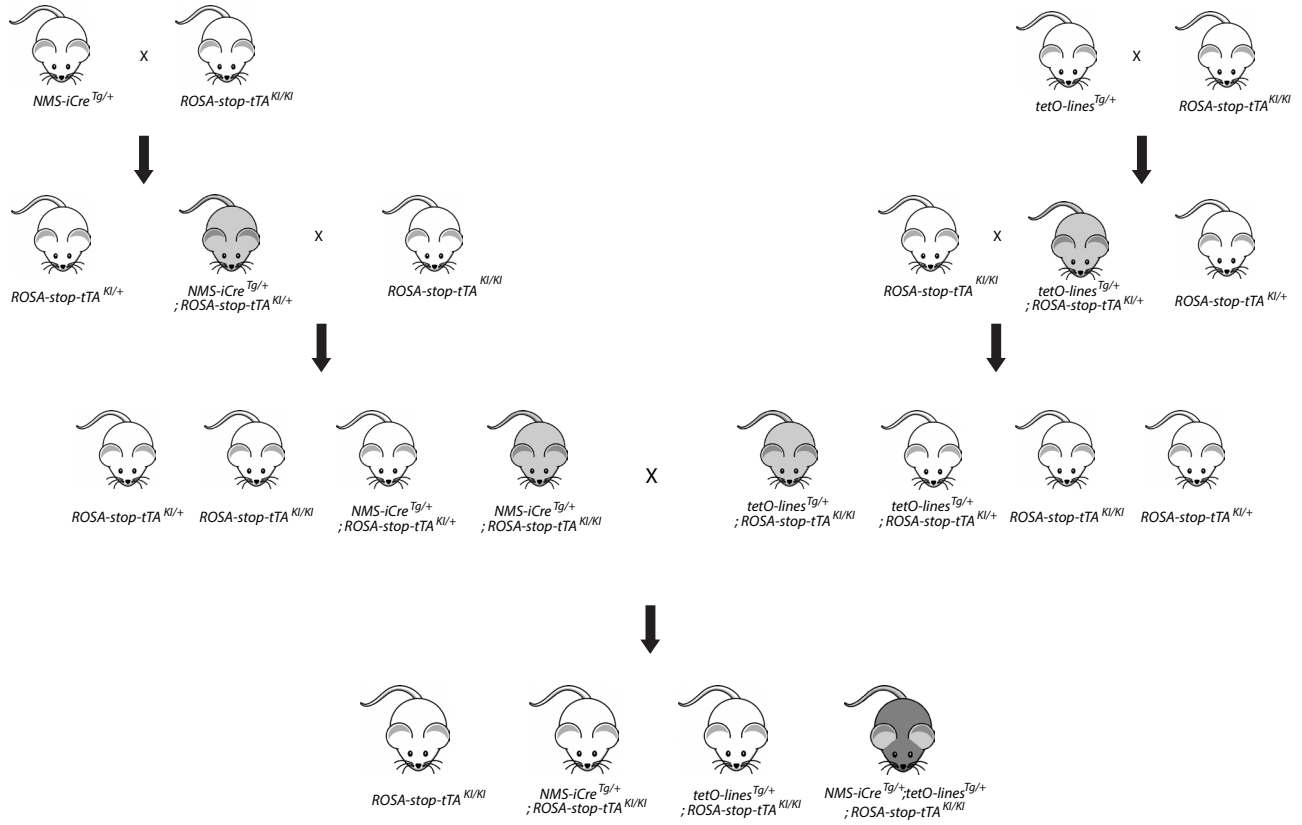**B**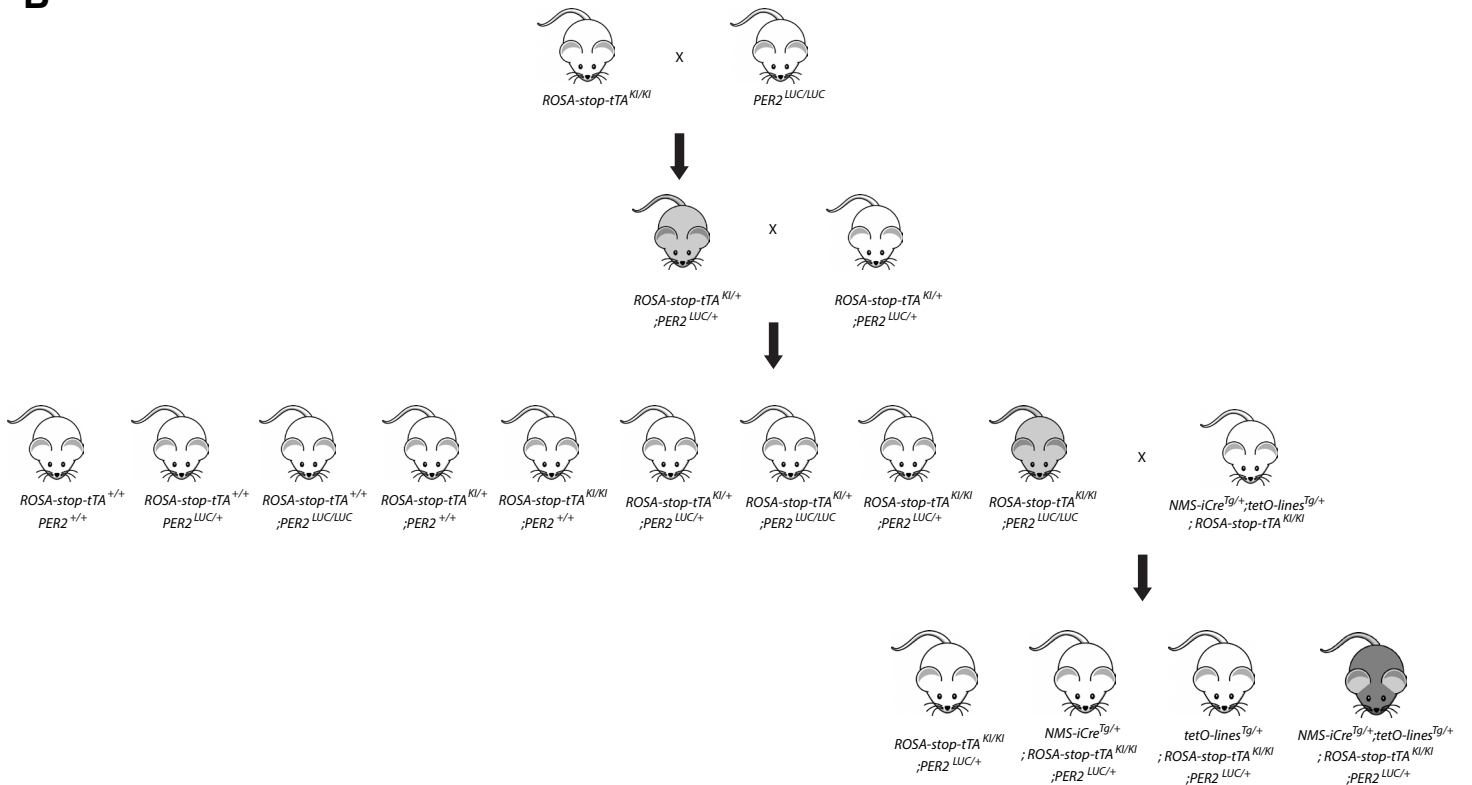

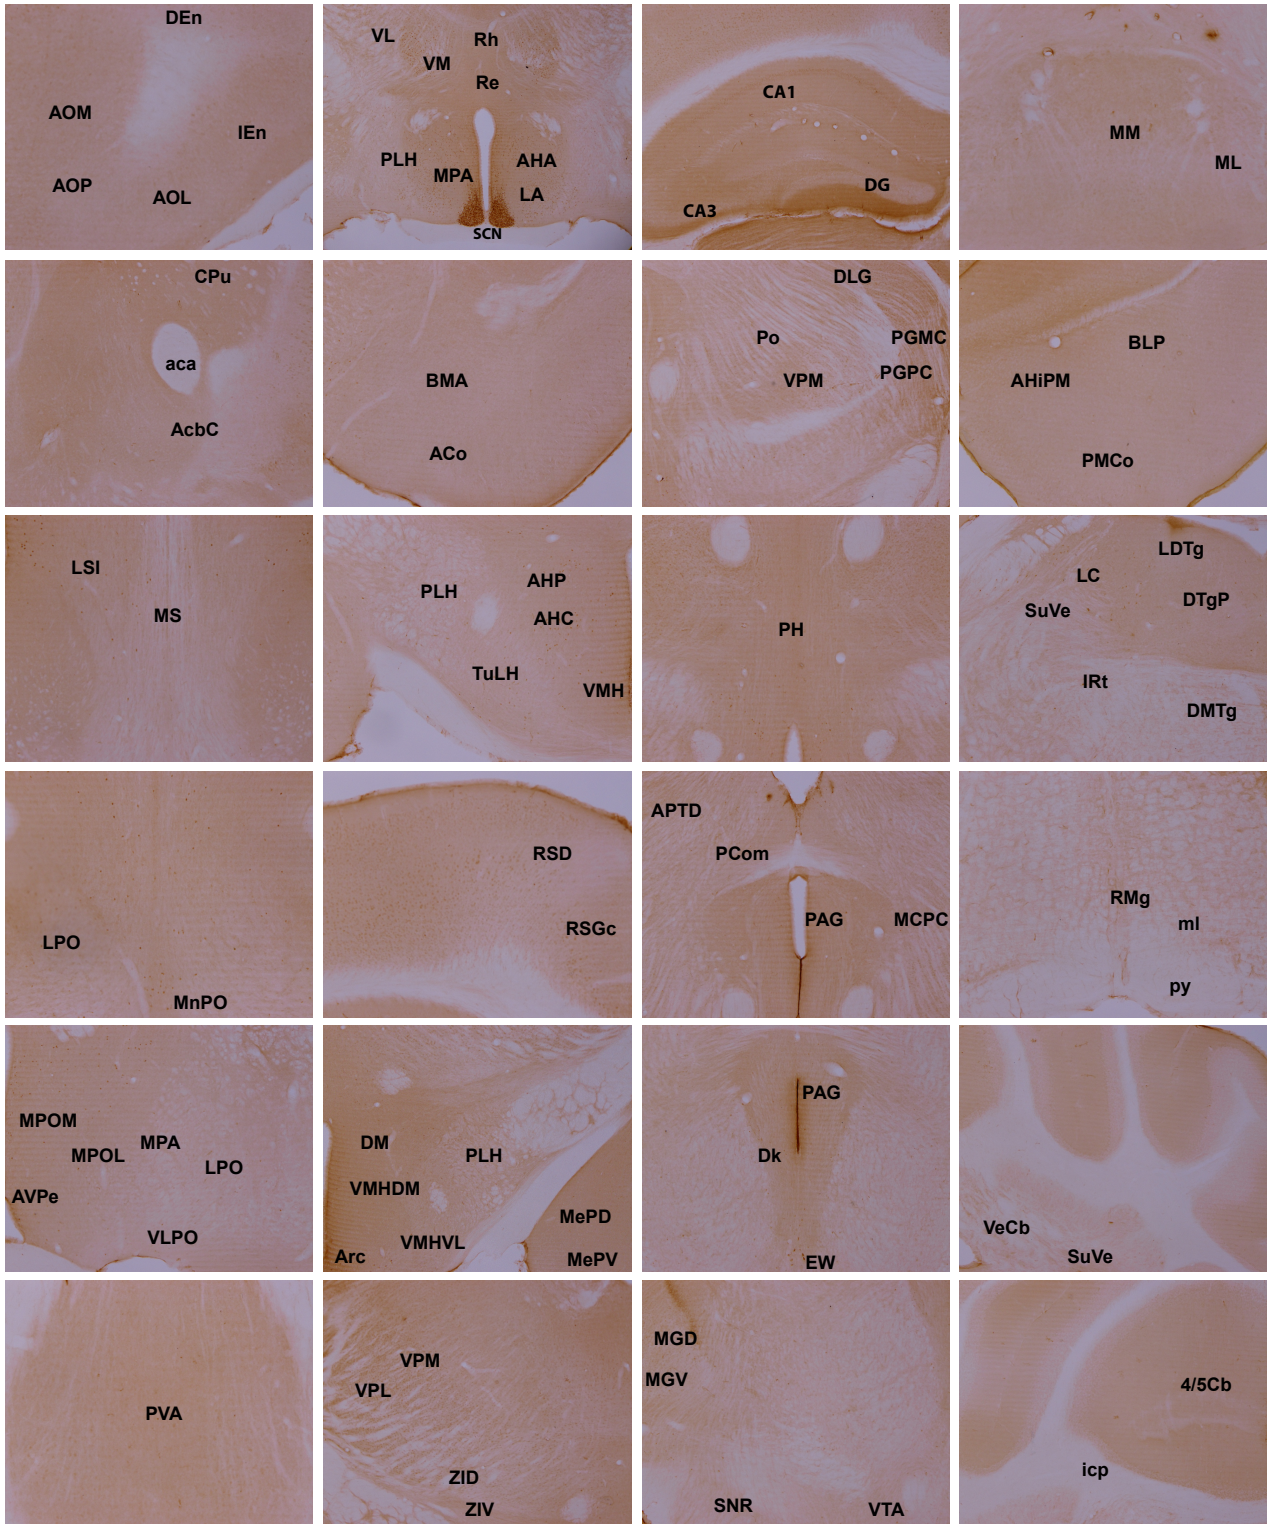

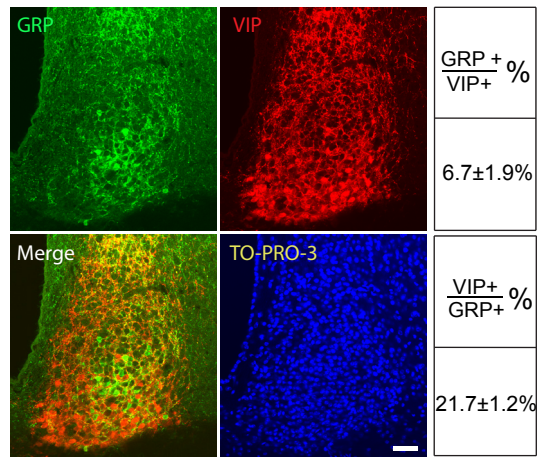

**A**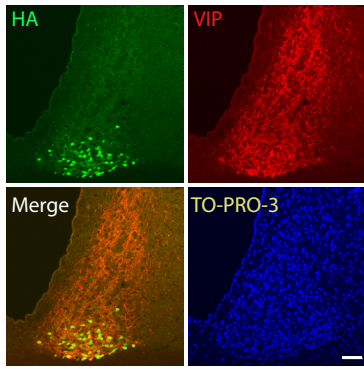**B**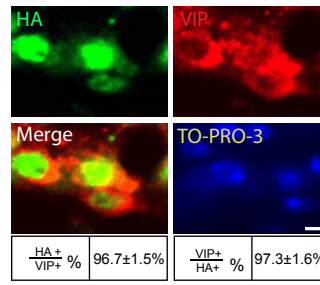**C**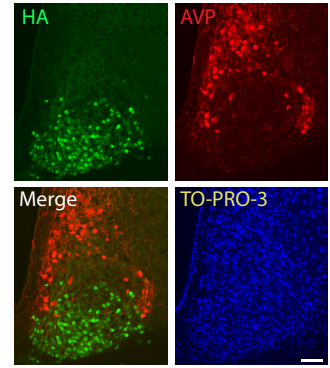**D**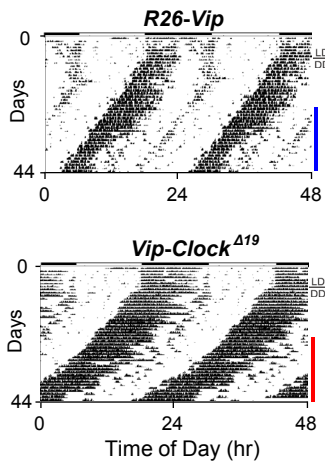**E**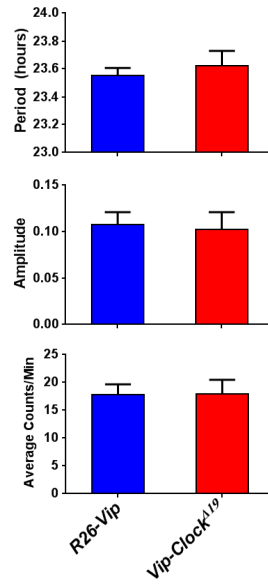

**A**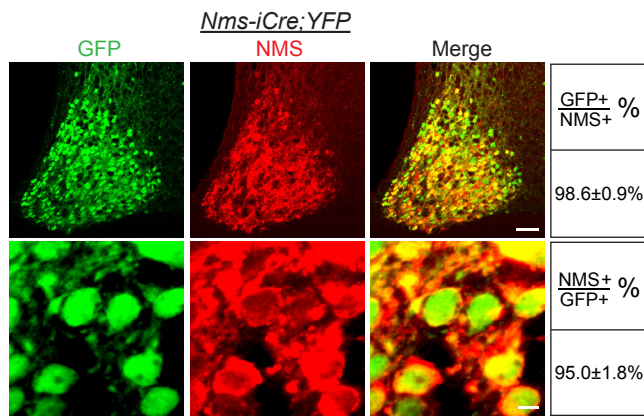**B**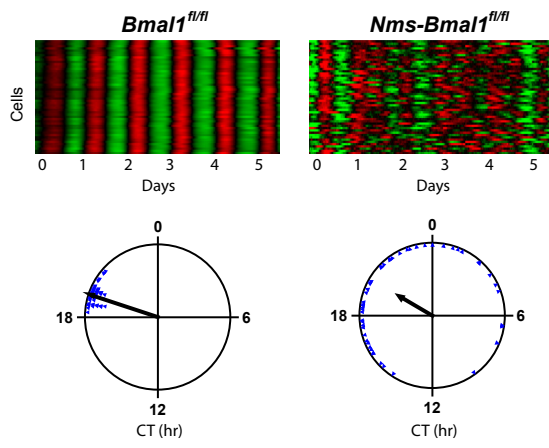

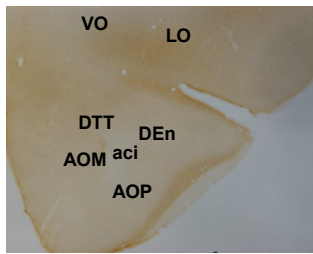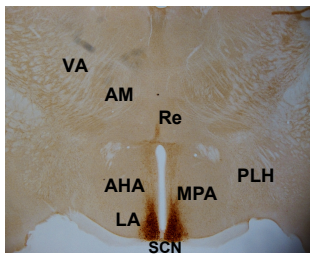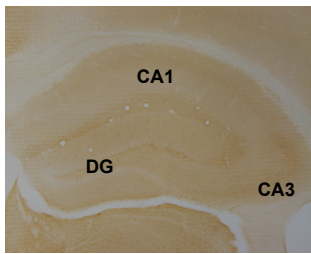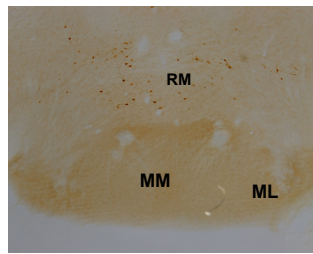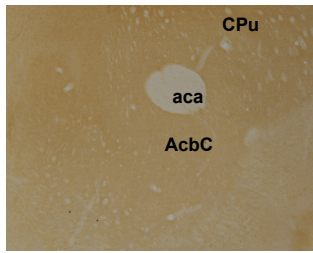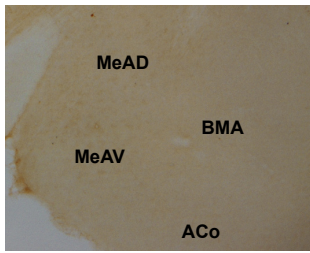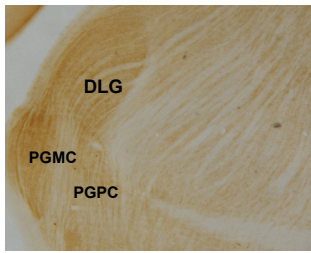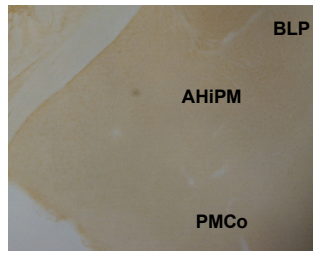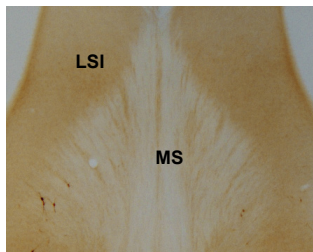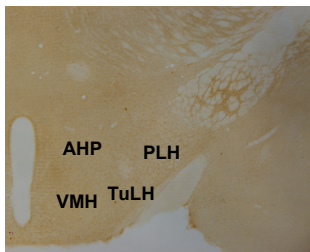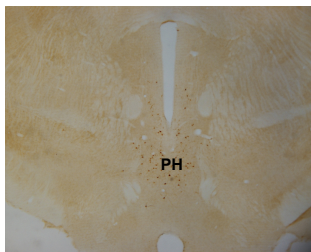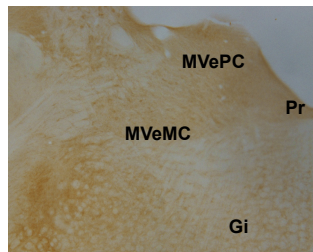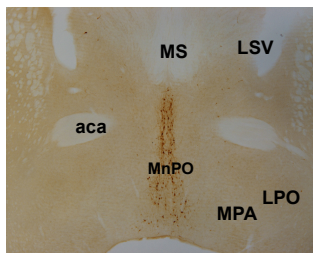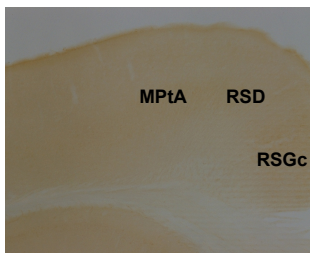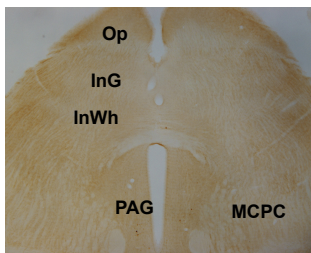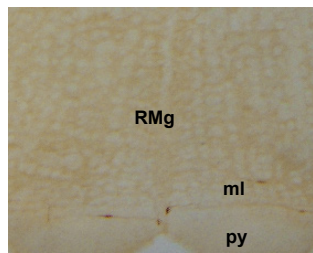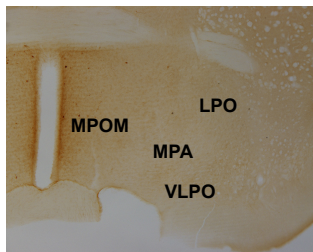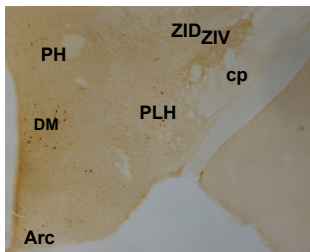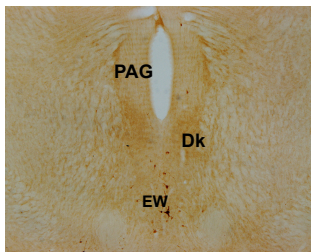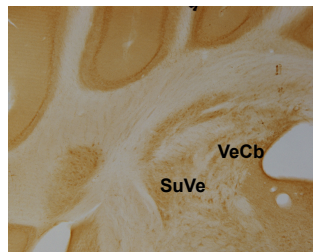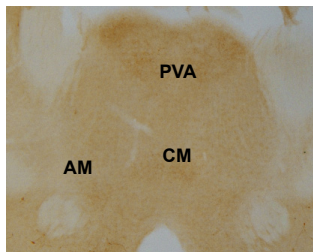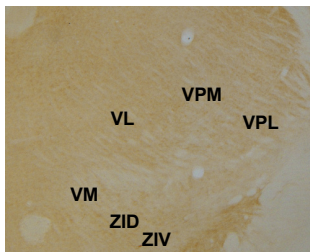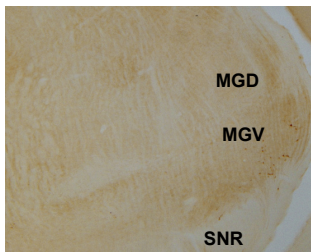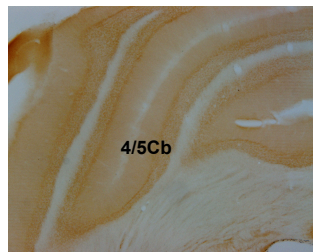

## SUPPLEMENTAL EXPERIMENTAL PROCEDURES

### Generation and Genotyping of *Nms-iCre* BAC transgenic and *Nms*<sup>-/-</sup> mice

A BAC construct that contains an IRES2-iCre cassette inserted into the 3'-UTR region of the *Nms* genomic sequence was generated by recombineering using BAC clone RP23-101P2 (CHORI BACPAC) and a plasmid containing an IRES2-iCre bicistronic expression cassette. The isolated *Nms-iCre* BAC DNA was injected into the pronucleus of C57BL/6N oocyte.

Transmission of *Nms-iCre* was assessed by Taqman® probe real-time PCR assay using the following primer/probe sets:

5'- TGAGGGACTACCTCCTGTACC-3'

5'- ACACAGCATTGGAGTCAGAAG-3'

FAM-5'-AGCTCAACATGCTGCACAGGAGATCT-3'

The targeting vector used to generate *Nms*<sup>-/-</sup> contains a FRT flanked PGK-NEO cassette, a DTA cassette, and a Cre recombinase cassette from pBS185 (Gibco BRL) that replaces the start codon of *Nms* on exon 1 and deletes a 59 bp signal peptide sequence at the ATG start codon. The Cre cassette was not functionally utilized in experiments described here. A total of 480 neomycin resistant clones were screened by PCR which resulted in 9 positive clones. Upon confirmation with Southern blot analysis, three independent clones were microinjected into 129/SvEvTac blastocyst. After successful germ-line transmission, the Neo cassette was removed by crossing to a ROSA26-FLPe line. Transmission of *Nms*<sup>-/-</sup> was assessed by using 2 primer sets using a common forward primer:

Forward 5'-ACCCTCGGGAAATGCTCATCACCT-3'

Reverse null allele 5'-TCACTTGGTCGTGGCAGCCC-3'

Reverse WT allele 5'-GCCCATCACCTTTCAGTTTGGGGG-3'



All mice were backcrossed to C57BL/6J strain for at least five generations. All microinjections were performed by the UT Southwestern Transgenic Core facility.

### **Mouse breeding**

To generate experimental mice efficiently, hemizygous *Nms-iCre* mice were crossed with *ROSA-STOP-tTA* mice for two generations to generate mice that are hemizygous for *Nms-iCre* and homozygous for *ROSA-STOP-tTA* (referred to as *R26-Nms*). Likewise, the hemizygous *tetO* lines (*tetO-Clock*<sup>Δ19</sup>, *tetO-Per2*, and *tetO-TeNT*) were also bred individually with *ROSA-STOP-tTA* for two generations to generate mice that were hemizygous for the *tetO* transgene and homozygous for *ROSA-STOP-tTA* (referred to as *R26-Clock*<sup>Δ19</sup>, *R26-Per2*, and *R26-TeNT*, respectively). Subsequently, *R26-Nms* mice were crossed with *R26-Clock*<sup>Δ19</sup>, *R26-Per2*, or *R26-TeNT* to generate mice that express the *tetO-Clock*<sup>Δ19</sup>, *tetO-Per2*, and *tetO-TeNT* transgene, respectively, under the regulation of *ROSA-STOP-tTA* in *Nms*-expressing cells. These quadruple transgenic mice are referred to as *Nms-Clock*<sup>Δ19</sup>, *Nms-Per2*, and *Nms-TeNT*. Littermate controls that lack either the *Nms-iCre* and/or the *tetO*- transgene are also produced from these crosses. For bioluminescence experiments, *PER2::LUC* mice (Yoo et al., 2004) were crossed with *ROSA-STOP-tTA* for at least two generations to produce mice homozygous for both alleles. Subsequently, these mice were crossed with *Nms-Clock*<sup>Δ19</sup>, *Nms-Per2*, or *Nms-TeNT* to generate mice that carried a hemizygous copy of *Nms-iCre*, a homozygous copy of *ROSA-STOP-tTA*, a heterozygous copy of *PER2::LUC*, and a hemizygous copy of *tetO-Clock*<sup>Δ19</sup>, *tetO-Per2*, or *tetO-TeNT*, respectively. *Nms-TeNT;SynGFP* mice were generated in a similar manner by crossing *Nms-TeNT* mice to *tetO-SynGFP* mice with homozygous copies of *ROSA-STOP-tTA*. To generate *Vip-Clock*<sup>Δ19</sup> mice which contain a hemizygous copy of *tetO-Clock*<sup>Δ19</sup> and homozygous

copies of *Vip-Cre* and *ROSA-STOP-tTA*, *Vip-Cre* mice (Taniguchi et al., 2011) and *R26-Clock<sup>Δ</sup>*<sup>19</sup> mice (described above) were used in multiple sequential crosses which also resulted in the production of *R26-Vip* mice for experimental control. *Nms-Bmal1<sup>fl/fl</sup>* was generated by crossing *Nms-iCre* mice to *Bmal1<sup>fl/fl</sup>* mice (Storch et al., 2007) for at least two generations. *Nms-Bmal1<sup>fl/fl</sup>;Luc* was generated by crossing *Nms-Bmal1<sup>fl/fl</sup>* to PER2::LUC for several generations. *Nms-iCre;YFP* and *Nms-Bmal1<sup>fl/fl</sup>;YFP* mice were generated by crossing *Nms-iCre* or *Nms-Bmal1<sup>fl/fl</sup>* to ROSA-STOP-YFP mice (Srinivas et al., 2001) for at least two generations, respectively, to generate mice that have homozygous copies of ROSA-YFP along with *Nms-iCre* or *Nms-Bmal1<sup>fl/fl</sup>*. *Nms<sup>-/-</sup>Nmu<sup>-/-</sup>* mice were generated by crossing *Nms<sup>-/-</sup>* to *Nmu<sup>-/-</sup>* mice (Hanada et al., 2004) for at least two generations to generate double homozygous *Nms<sup>-/-</sup>Nmu<sup>-/-</sup>* mice along with WT, *Nms<sup>-/-</sup>*, and *Nmu<sup>-/-</sup>* mice. All experimental mice used were backcrossed to C57BL/6J for at least 5 generations.

### **Doxycycline (Dox) treatment**

Doxycycline hyclate (Sigma-Aldrich; D9891) was given *ad libitum* in drinking water at a concentration of 10 µg/ml for all mice as described except for *Nms-TeNT* mice and related controls which were given 20 µg/ml of Dox. All Dox were renewed every 3 to 4 days (Hong et al., 2007). All mice were given free access to regular food.

### **Immunohistochemistry (IHC) and In Situ Hybridization (ISH)**

IHC and ISH experiments were performed similarly as described previously (Chemelli et al., 1999). Mice were anesthetized with ketamine/xylazine/saline cocktail (ketamine, 10 mg/ml; xylazine, 2 mg/ml) at 0.01 ml/g and intracardially perfused with 5-10 ml of 0.9% saline solution followed by 50 ml of 4% paraformaldehyde (Sigma-Aldrich) in PBS, pH 7.4. Brains were removed and postfixed overnight at 4°C in 4% paraformaldehyde. Coronal sections (50 µm

thick) were prepared using a Vibratome (Leica Microsystems). Free-floating sections were blocked in 3% normal goat serum (Vector Laboratories) with phosphate-buffered saline (PBS; pH 7.4) containing 0.3% Triton X-100 at room temperature for 1 h, followed by incubation with primary antibodies in PBS + 3% normal goat serum and 0.3% Triton X-100. After 2 overnight incubation of primary antibodies in 4°C, sections were washed 3 times with PBS and stained with the appropriate secondary antibodies in PBS + 0.3% Triton X-100 at room temperature for 1 h. Following this, sections were washed 3 times with PBS and incubated with TO-PRO-3 1:100 (Invitrogen) at room temperature for 1 h. For stereological counting, sections were incubated with NeuroTrace® 530 Red Fluorescent Nissl Stain 1:100 (Invitrogen). After staining, all sections were washed and mounted with ProLong® Gold Antifade Reagent with DAPI (Invitrogen). Primary antibodies used were rat anti-HA 1:100 (Roche), rabbit anti-NMS 1:1000 (Bachem), rabbit anti-BMAL1 (Novus Biologicals), guinea pig anti-VIP 1:2000 (Phoenix Pharmaceuticals), rabbit anti-AVP 1:4000 (Immunostar), rabbit anti-GRP 1:500 (Immunostar), chicken anti-GFP 1:500 (Invitrogen), rabbit anti-GFP 1:500 (Invitrogen), rabbit anti-VAMP2 (Synaptic Systems), and guinea pig anti-PER2 1:2000 (Yoo et al., 2013). Secondary antibodies include goat anti-rat Alexa 488 1:500 (Invitrogen), goat anti-chicken Alexa 488 1:500 (Invitrogen), goat anti-rabbit Alexa 488 1:500 (Invitrogen), goat anti-rabbit Alexa 546 1:500 (Invitrogen), and goat anti-guinea pig Alexa 546 1:500 (Invitrogen). For detection of NMS, VIP, and GRP cell bodies, colchicine (10-20 µg) was stereotaxically infused into the lateral cerebral ventricles of experimental mice 24-48 h before fixation.

For in situ hybridization, a 415 bp cDNA fragment was subcloned into pBluescript II SK(+) vector. Antisense riboprobes were generated with T7 RNA polymerase using the Maxiscript kit (Ambion) in the presence of 35S-CTP and 35S-UTP (MP Bio). Forebrain regions

were dissected from three C57BL/6J mice. Every fourth 35  $\mu$ M coronal section was processed and used for ISH.

### **IHC image collection and analyses**

Fluorescence-immunolabeled images were acquired using a Zeiss LSM 510 confocal microscope. Post-imaging processing and co-localization analyses were performed using ImageJ. In all co-localization studies, 2-3 mice were used for each pair of analysis. Cells from every other section were used, resulting in 8-10 SCN sections of 50  $\mu$ M thickness for each individual mouse. Only cells showing levels of expression clearly above background were counted.

### **Stereological cell counting**

Fluorescence staining was visualized and subjected to stereological analysis using an Olympus BX-51 microscope and Stereo Investigator software (MBF Bioscience). Every other coronal section (50  $\mu$ m thick) spanning the entire SCN from one brain hemisphere was counted using the Optical Fractionator workflow. A grid size of 80 x 80  $\mu$ m and a frame size of 25 x 25  $\mu$ m were used for anti-HA stained slices. For NeuroTrace Nissl staining, a grid size of 60 x 60  $\mu$ m and a frame size of 20 x 20  $\mu$ m were used. All contours were drawn at low magnification (10X, 0.3 NA) and counted at high magnification (100X oil, 1.3 NA). In all samples, the coefficient of error (CE, Gundersen  $m=0$ ), a measure of the precision of stereological estimates (Gundersen and Jensen, 1987), ranged from 0.08-0.11.

### **Explant culture and bioluminescence data analysis**

All mice used for explants cultures were raised on water and were at least 8 weeks of age at the time of experimentation. Following methods described previously (Yamazaki and Takahashi, 2005; Yoo et al., 2004), after cervical dislocation, the brain was removed and placed immediately in Hank balanced salt solution (HBSS; with 10 mM HEPES, 25 units/ml penicillin,

and 25 µg/ml streptomycin) on ice. Coronal slices containing the SCN were sectioned at 300 µm using a vibratome, followed by manual dissection of the SCN, resulting in a tissue approximately 1 mm by 1 mm in size. Dissected SCN tissues were cultured on a Millicell culture membrane (PICMORG50, Millipore) with 1.2 ml DMEM medium (Cellgro), supplemented with 10 mM HEPES (pH 7.2), 2% B27 (Invitrogen), 25 units/ml penicillin, 25 mg/ml streptomycin, and 0.1 mM luciferin (Promega). Explant cultures were maintained at 36°C in an incubator or in a temperature-controlled room. Bioluminescence was continuously monitored without interruption for >7 d immediately upon placement in culture using LumiCycle 32 luminometers (Actimetrics, Wilmette, IL).

For bioluminescence analyses, LumiCycle software (Actimetrics) was used to subtract the 24 hour moving average from the raw luminescence data and smoothed by 0.5 h adjacent averaging (Pendergast et al., 2009). To determine the period, baseline-subtracted and smoothed data were exported to ClockLab (Actimetrics) and determined by fitting a regression line to the acrophase of at least 3 days of the PER2::LUC rhythm. To quantitatively assess amplitude, the third stable peak of the baseline-subtracted, smooth data was assessed. All values are displayed as the mean ± SEM.

### **Single-cell bioluminescence imaging and data analysis**

SCN explants were sectioned and cultured as described above. All mice used were raised on water. Bioluminescence recording was performed in a similar manner as previously described (Buhr et al., 2010; Welsh et al., 2004) with some modifications. Cultures containing individual SCN explants were placed on an inverted microscope (Leica DMIR) mounted on an anti-vibration table (TMC) placed within a heated Lucite chamber (Solent Scientific, UK) maintained at 37°C. The stage, attached with a temperature sensor, was maintained at  $37 \pm 0.1^\circ\text{C}$  throughout

the experiment. During image acquisition, the entire setup was enclosed in a light-tight cabinet with inlets and outlets for cables and cryo-tubes.

Imaging recording was performed using a cryo-cooled 600 Series CCD camera (Spectral Instruments, Tucson, AZ) equipped with a 20X, 0.3 NA objective, and the camera was operated at -100°C and 4 x 4 binning of a 2048 x 2048 pixel array during image acquisition. Each exposure/readout cycle was 15 min, and 32 bit images were collected and stored. Image stacks were then analyzed using ImageJ (NIH). Cosmic ray signals were removed using a top-hat filter with a radius of 2-pixels and threshold of 50. Kalman filter was then applied for smoothing. Subsequently, the bioluminescence values of each cell in the image sequence were outlined individually within a region of interest (ROI) and exported into Excel (Microsoft, Redmond, WA), where values were detrended by subtraction of baseline bioluminescence based on a running average from 12 hrs before to 12 hrs after each time point. The baseline-subtracted data was curve fitted to a modified damped sine wave in Prism (Graphpad) using the equation:  $Y = \text{Amplitude} * \exp(-K * X) * \sin((2 * \pi * X / \text{Wavelength}) - \text{Phase} * 2 * \pi / \text{Wavelength})$ , wherein K is the damping constant, and the wavelength, phase, and amplitude were determined by the best-fit results. Heat-maps of Z-score normalized data were arranged by phase calculated from the above formula and plotted using the program MeV. Circadian phase clustering was assessed by Rayleigh's test and plotted with Oriana software (Kovach Computing Services, Anglesey, UK).

## SUPPLEMENTAL REFERENCES

Buhr, E.D., Yoo, S.H., and Takahashi, J.S. (2010). Temperature as a universal resetting cue for mammalian circadian oscillators. *Science* 330, 379–385.

Chemelli, R.M., Willie, J.T., Sinton, C.M., Elmquist, J.K., Scammell, T., Lee, C., Richardson, J.A., Williams, S.C., Xiong, Y., Kisanuki, Y., et al. (1999). Narcolepsy in orexin knockout mice: molecular genetics of sleep regulation. *Cell* 98, 437–451.

Franklin, B.J., and Paxinos, G.T. (2008). *The Mouse Brain in Stereotaxic Coordinates* (New York, Academic Press).

Welsh, D.K., Yoo, S., Liu, A.C., Takahashi, J.S., and Kay, S.A. (2004). Bioluminescence imaging of individual fibroblasts reveals persistent, independently phased circadian rhythms of clock gene expression. *Curr Biol.* 14, 2289–2295.

Yoo, S.H., Mohawk, J.A., Siepka, S.M., Shan, Y., Huh, S.K., Hong, H.-K., Kornblum, I., Kumar, V., Koike, N., Xu, M., et al. (2013). Competing E3 Ubiquitin Ligases Govern Circadian Periodicity by Degradation of CRY in Nucleus and Cytoplasm. *Cell* 152, 1091–1105.
